# Supplementary material for: A Ca3Sc2Si3O12:Ce3+,Cr3+,Li+ phosphor-in-glass film for high-power laser-driven near-infrared lighting
Source: Royal Society of Chemistry journal article supplement (doi:10.1039/d4tc03017f), 2024-01-01
Supplement: d4tc03017f1.pdf [file d4tc03017f1.pdf]

## Supporting Information for

# **Ca<sub>3</sub>Sc<sub>2</sub>Si<sub>3</sub>O<sub>12</sub>: Ce<sup>3+</sup>, Cr<sup>3+</sup>, Li<sup>+</sup> Phosphor-in-Glass Film for High-power Laser-Driven Near-infrared Lightings**

Ping Sui,<sup>‡a,b</sup> Wei Zhang,<sup>‡b</sup> Hang Lin,<sup>\*a,b</sup> Bo Wang,<sup>c</sup> Pengfei Wang,<sup>b</sup> Yi Lin,<sup>b</sup> Ju Xu,<sup>b</sup>  
Yao Cheng,<sup>b</sup> Yuansheng Wang<sup>\*b</sup>

---

a. State Key Laboratory of Structural Chemistry, Fuzhou, Fujian, 350002, China.

E-mail: [lingh@fjirsm.ac.cn](mailto:lingh@fjirsm.ac.cn)

b. Key Laboratory of Optoelectronic Materials Chemistry and Physics, Fujian Institute of Research on the Structure of Matter, Chinese Academy of Sciences, Fuzhou, Fujian, 350002, China.

E-mail: [ywang@fjirsm.ac.cn](mailto:ywang@fjirsm.ac.cn)

c. Fujian Science & Technology Innovation Laboratory for Optoelectronic Information of China, Fuzhou, Fujian, 350108, China

d. School of Applied Physics and Materials, Wuyi University, Jiangmen, Guangdong, 529020, China.

<sup>‡</sup> Ping Sui and Wei Zhang contributed equally to this article.

**Table S1.** Comparison of the emission peak ( $\lambda_{em}$ ), NIR output powers ( $P_{out}$ ) and conversion efficiencies (CE) based on laser-driven NIR illumination and LED-driven NIR illumination.

| Compound                                     | $\lambda_{em}$ (nm) | $P_{out}$ (W) | CE (%) | Ref.      |
|----------------------------------------------|---------------------|---------------|--------|-----------|
| $Ca_3Sc_2Si_3O_{12}: Ce^{3+}, Cr^{3+}, Li^+$ | 780                 | 1.697         | 9.78   | This work |
| $Gd_3Al_2Ga_3O_{12}: Cr^{3+}$                | 732                 | 1.650         | 30.0   | 1         |
| $Gd_3Al_{1.5}Sc_{0.5}Ga_3O_{12}: Cr^{3+}$    | 752                 | 0.920         | 14.0   | 2         |
| $Na_3GaF_6: Cr^{3+}, Li^+$                   | 758                 | 0.970         | 20.9   | 3         |
| $Gd_3Sc_{1.5}Al_{0.5}Ga_3O_{12}: Cr^{3+}$    | 762                 | 0.750         | 7.70   | 4         |
| $Ga_{1.7}(Zn-Ge)_{0.3}O_3: Cr^{3+}$          | 768                 | 0.630         | 20.0   | 5         |
| $KAlP_2O_7: Cr^{3+}$                         | 790                 | 0.080         | 7.91   | 6         |
| $Ca_3MgHfGe_3O_{12}: Cr^{3+}$                | 805                 | 0.120         | 7.20   | 7         |
| $KGaP_2O_7: Cr^{3+}$                         | 812                 | 0.470         | 10.7   | 8         |

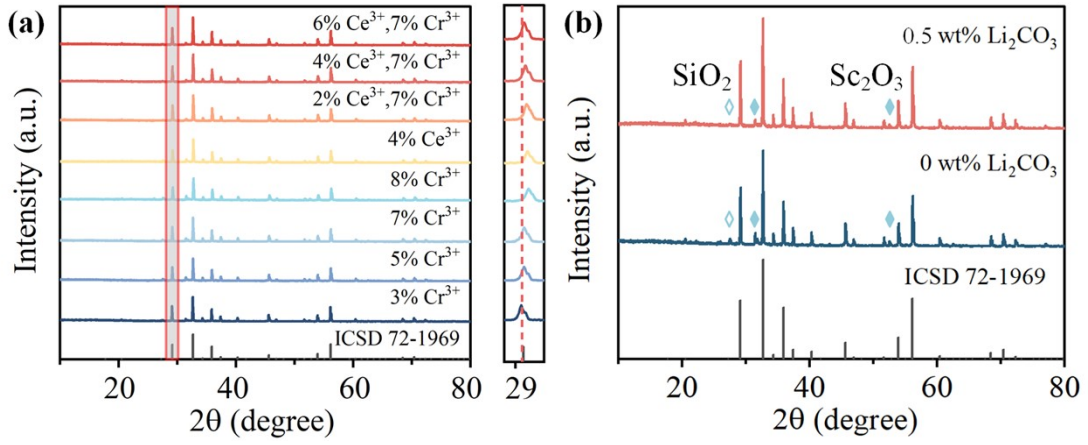

**Figure S1.** XRD patterns of (a) CSSO: x%Cr, CSSO: y%Ce, 7%Cr and (b) CSSO: 7%Cr with 0 wt% or 0.5 wt% Li<sub>2</sub>CO<sub>3</sub>.

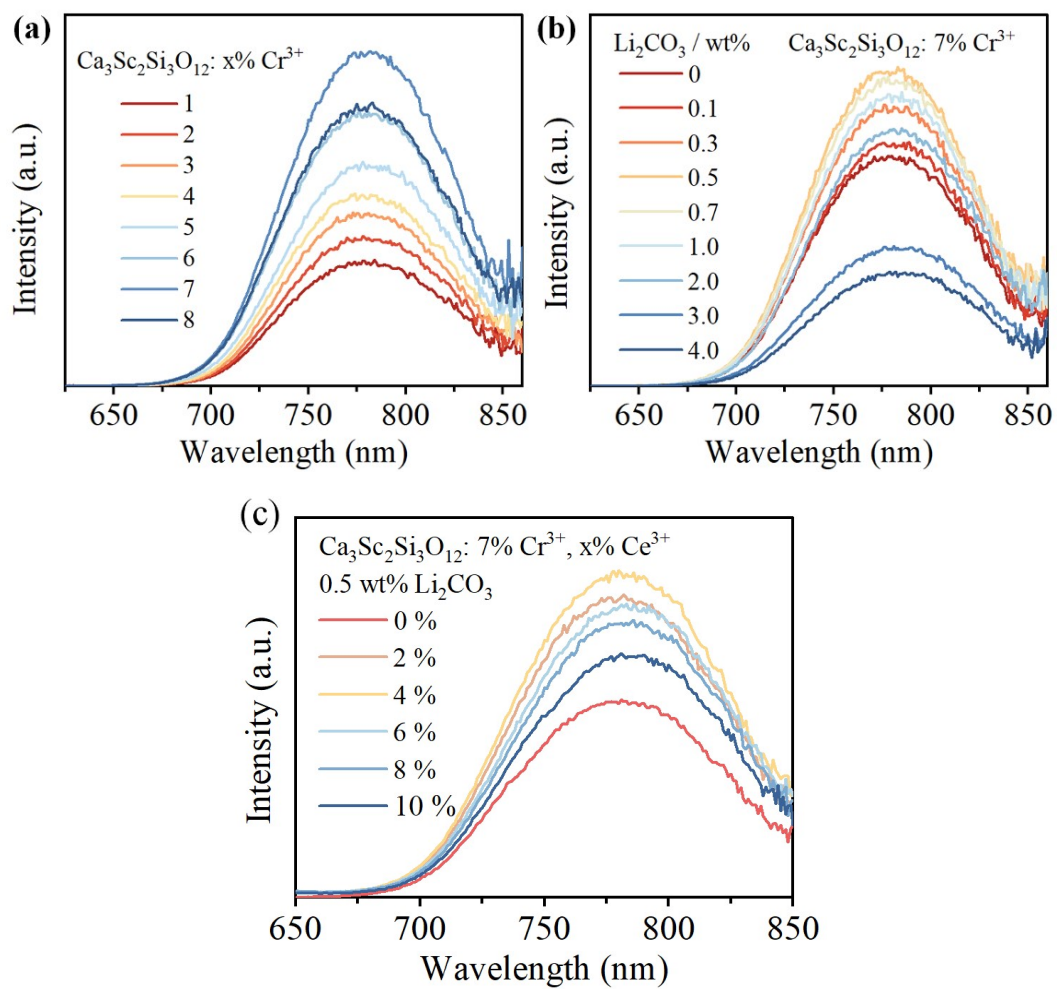

**Figure S2.** The luminescence intensity of the different doping of  $\text{Ce}^{3+}$ ,  $\text{Cr}^{3+}$  and  $\text{Li}^+$  for phosphor.

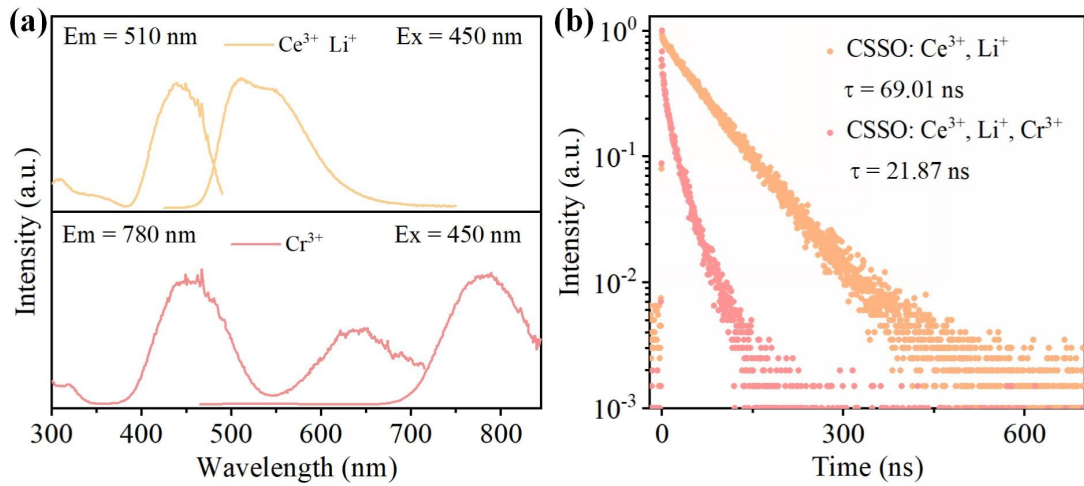

**Figure S3.** (a) The excitation and emission of CSSO:Cr<sup>3+</sup> and CSSO:Ce<sup>3+</sup>, Li<sup>+</sup> samples both of which can be excited by 450 nm laser. (b) Luminescent decay curves of CSSO:Ce<sup>3+</sup>, Li<sup>+</sup>, Cr<sup>3+</sup> phosphor powder and CSSO:Ce<sup>3+</sup>, Li<sup>+</sup> phosphor powder.

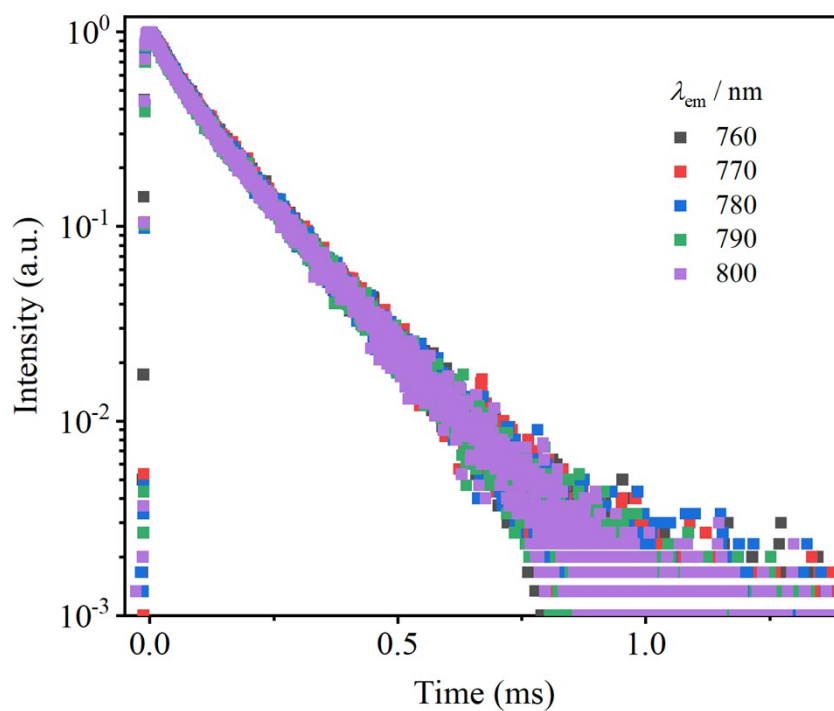

**Figure S4.** Photoluminescence decay curves of CSSO: Ce<sup>3+</sup>, Cr<sup>3+</sup>, Li<sup>+</sup> phosphor powders by monitoring the Cr<sup>3+</sup> emission at different wavelengths under blue light excitation at 450 nm.

## References

1. H. J. Jiang, L. Y. Chen, G. J. Zheng, Z. H. Luo, X. H. Wu, Z. H. Liu, R. Y. Li, Y. F. Liu, P. Sun and J. Jiang, Ultra - Efficient GAGG: Cr<sup>3+</sup> Ceramic Phosphor - Converted Laser Diode: A Promising High - Power Compact Near - Infrared Light Source Enabling Clear Imaging, *Adv. Opt. Mater.*, 2022, **10**, 2102741.
2. X. H. Wu, Z. H. Luo, Y. J. Zhuang, Z. H. Liu, P. Sun, Y. F. Liu, L. L. Zhang, H. M. Qin and J. Jiang, The Co-Optimization of Efficiency and Emission Bandwidth in GSAGG: Cr<sup>3+</sup> NIR Ceramic Phosphors, *Ceram. Int.*, 2023, **49**, 21688-21694.
3. F. Q. He, E. H. Song, H. Chang, Y. Y. Zhou, Z. G. Xia and Q. Y. Zhang, Interstitial Li<sup>+</sup> Occupancy Enabling Radiative/Nonradiative Transition Control toward Highly Efficient Cr<sup>3+</sup>-Based Near-Infrared Luminescence, *ACS Appl. Mater. Interfaces*, 2022, **14**, 31035-31043.
4. E. T. Basore, W. G. Xiao, X. F. Liu, J. H. Wu and J. R. Qiu, Broadband Near - Infrared Garnet Phosphors with Near - Unity Internal Quantum Efficiency, *Adv. Opt. Mater.*, 2020, **8**, 2000296.
5. J. H. Lin, L. Y. Zhou, Y. Y. Shen, J. Fu, Y. L. Chen, L. Lei, R. G. Ye, Y. Shen, D. G. Deng and S. Q. Xu, [Zn<sup>2+</sup>-Ge<sup>4+</sup>] Co-Substitutes [Ga<sup>3+</sup>-Ga<sup>3+</sup>] to Coordinately Broaden the Near-Infrared Emission of Cr<sup>3+</sup> in Ga<sub>2</sub>O<sub>3</sub> Phosphors, *Phys. Chem. Chem. Phys.*, 2023, **25**, 2090-2097.
6. H. S. Zhang, J. Y. Zhong, F. Du, L. Chen, X. L. Zhang, Z. F. Mu and W. R. Zhao, Efficient and Thermally Stable Broad-Band Near-Infrared Emission in a KAlP<sub>2</sub>O<sub>7</sub>: Cr<sup>3+</sup> Phosphor for Nondestructive Examination, *ACS Appl. Mater. Interfaces*, 2022, **14**, 11663-11671.
7. C. J. Li and J. Y. Zhong, Efficient and Thermally Robust Broadband Near - Infrared Emission in a Garnet Ca<sub>3</sub>MgHfGe<sub>3</sub>O<sub>12</sub>: Cr<sup>3+</sup> Phosphor, *Adv. Opt. Mater.*, 2022, **11**, 2202323.
8. J. Y. Zhong, C. J. Li, W. R. Zhao, S. H. You and J. Brgoch, Accessing High-Power Near-Infrared Spectroscopy Using Cr<sup>3+</sup>-Substituted Metal Phosphate Phosphors, *Chem. Mater.*, 2021, **34**, 337-344.
